# Supplementary material
Source: Frontiers journal article supplement (https://www.frontiersin.org/articles/2027)
Supplement: downloadfile [file 2027]

**Table S1**: Arabidopsis genes used in the mbSUS screen. Clones in red were only mobilized in the NubG vector; light blue, only as Cub; while the purple were mobilized in both vectors. The asterisk indicates the Cub clones which passed the pre-screen.

| AT1G03520 |
| --- |
| AT1G05170 |
| AT1G05580 |
| AT1G06225* |
| AT1G07160* |
| AT1G07550 |
| AT1G07560* |
| AT1G07795 |
| AT1G08040 |
| AT1G08280 |
| AT1G08590* |
| AT1G08650 |
| AT1G09840 |
| AT1G09960 |
| AT1G09970* |
| AT1G10090 |
| AT1G11000 |
| AT1G11020 |
| AT1G11130 |
| AT1G11230 |
| AT1G11310* |
| AT1G11730 |
| AT1G12670 |
| AT1G14390* |
| AT1G14590 |
| AT1G14600 |
| AT1G15170 |
| AT1G15180 |
| AT1G15610* |
| AT1G15620 |
| AT1G16410* |
| AT1G16670 |
| AT1G16900 |
| AT1G17750* |
| AT1G18520* |
| AT1G18580 |
| AT1G18700 |
| AT1G19430 |
| AT1G20090 |
| AT1G21250 |
| AT1G21270 |
| AT1G21460 |
| AT1G21940* |
| AT1G22070 |
| AT1G22300 |
| AT1G22710 |
| AT1G24440 |
| AT1G24650* |
| AT1G25320* |
| AT1G26480 |
| AT1G26850 |
| AT1G27120 |
| AT1G27200 |
| AT1G27710 |
| AT1G28160 |
| AT1G28440* |
| AT1G28695 |
| AT1G29720 |
| AT1G29790 |
| AT1G30270 |
| AT1G30360 |
| AT1G31420* |
| AT1G31850 |
| AT1G32090 |
| AT1G32320* |
| AT1G33080 |
| AT1G33250 |
| AT1G34110 |
| AT1G34210* |
| AT1G34300 |
| AT1G35160 |
| AT1G42560 |
| AT1G47220 |
| AT1G47240 |
| AT1G47530 |
| AT1G48270* |
| AT1G48370 |
| AT1G48470 |
| AT1G49720 |
| AT1G50610 |
| AT1G50820 |
| AT1G51340 |
| AT1G51460 |
| AT1G51800* |
| AT1G51940 |
| AT1G52310 |
| AT1G53290 |
| AT1G53510 |
| AT1G53730* |
| AT1G57550* |
| AT1G58340 |
| AT1G58520 |
| AT1G59670 |
| AT1G59820 |
| AT1G60630* |
| AT1G60800 |
| AT1G60940 |
| AT1G61290 |
| AT1G62935 |
| AT1G62950* |
| AT1G63260 |
| AT1G63430* |
| AT1G63700* |
| AT1G64170 |
| AT1G64780* |
| AT1G64870 |
| AT1G65190 |
| AT1G65380 |
| AT1G65730 |
| AT1G66200 |
| AT1G66350 |
| AT1G66830* |
| AT1G67510* |
| AT1G67820 |
| AT1G67890 |
| AT1G69970* |
| AT1G69990 |
| AT1G70690 |
| AT1G71020* |
| AT1G71830* |
| AT1G71880 |
| AT1G72180* |
| AT1G72300* |
| AT1G72770* |
| AT1G73080 |
| AT1G73560 |
| AT1G73590 |
| AT1G74380 |
| AT1G74740 |
| AT1G75120 |
| AT1G75820* |
| AT1G77655* |
| AT1G77810 |
| AT1G78000 |
| AT1G78290 |
| AT1G78300 |
| AT1G79570 |
| AT1G79620 |
| AT1G79730 |
| AT1G80660 |
| AT1G80830* |
| AT1G80910 |
| AT2G01210 |
| AT2G01420 |
| AT2G01570 |
| AT2G01660 |
| AT2G02220 |
| AT2G02780 |
| AT2G02990 |
| AT2G04070 |
| AT2G04080 |
| AT2G04100 |
| AT2G04480* |
| AT2G07040* |
| AT2G07678 |
| AT2G07749* |
| AT2G13620 |
| AT2G13800 |
| AT2G14510* |
| AT2G16250 |
| AT2G16850 |
| AT2G17480 |
| AT2G18030 |
| AT2G19190 |
| AT2G20300 |
| AT2G20850* |
| AT2G20970 |
| AT2G22475 |
| AT2G23030 |
| AT2G23080 |
| AT2G23300* |
| AT2G23450 |
| AT2G23770 |
| AT2G23950* |
| AT2G24230* |
| AT2G26100 |
| AT2G26110 |
| AT2G26640 |
| AT2G26730 |
| AT2G26980 |
| AT2G27060* |
| AT2G28180 |
| AT2G28960* |
| AT2G28990* |
| AT2G30160 |
| AT2G30240 |
| AT2G30370* |
| AT2G30575 |
| AT2G31880* |
| AT2G32850 |
| AT2G33170 |
| AT2G33330 |
| AT2G33670* |
| AT2G34390 |
| AT2G35620* |
| AT2G36020* |
| AT2G36270 |
| AT2G37050 |
| AT2G37170 |
| AT2G37180 |
| AT2G37585 |
| AT2G37710 |
| AT2G38120* |
| AT2G38290 |
| AT2G39630 |
| AT2G39940 |
| AT2G40180 |
| AT2G40220 |
| AT2G41820* |
| AT2G41860 |
| AT2G42290* |
| AT2G42590 |
| AT2G42880 |
| AT2G44110 |
| AT2G44930* |
| AT2G45340* |
| AT2G45530 |
| AT2G45910 |
| AT2G46500* |
| AT2G47060 |
| AT3G01040 |
| AT3G01090 |
| AT3G01100 |
| AT3G01840 |
| AT3G02130 |
| AT3G02410* |
| AT3G02520 |
| AT3G02880* |
| AT3G03770* |
| AT3G05330* |
| AT3G05840* |
| AT3G06100* |
| AT3G06260 |
| AT3G06360 |
| AT3G07330 |
| AT3G08510 |
| AT3G08680 |
| AT3G10630 |
| AT3G11060 |
| AT3G12060* |
| AT3G12660 |
| AT3G13065* |
| AT3G13380 |
| AT3G14350* |
| AT3G14840 |
| AT3G14960 |
| AT3G15350 |
| AT3G16230 |
| AT3G17630* |
| AT3G17650 |
| AT3G17820 |
| AT3G19250 |
| AT3G20190* |
| AT3G20865* |
| AT3G21310 |
| AT3G21630 |
| AT3G21690 |
| AT3G22430 |
| AT3G23300 |
| AT3G23560 |
| AT3G24300 |
| AT3G24660* |
| AT3G25140 |
| AT3G26110* |
| AT3G26350* |
| AT3G28040* |
| AT3G28180 |
| AT3G28340 |
| AT3G29160 |
| AT3G42810 |
| AT3G42880* |
| AT3G44900 |
| AT3G44930 |
| AT3G45290* |
| AT3G46740 |
| AT3G47580 |
| AT3G48820 |
| AT3G49670 |
| AT3G50220* |
| AT3G50760 |
| AT3G51740 |
| AT3G52160 |
| AT3G53420* |
| AT3G53720 |
| AT3G54820 |
| AT3G56370* |
| AT3G57380 |
| AT3G57830* |
| AT3G59030 |
| AT3G60470 |
| AT3G60720 |
| AT3G61060 |
| AT3G61500* |
| AT3G62190 |
| AT3G63150 |
| AT3G63260 |
| AT3G63380* |
| AT4G00350 |
| AT4G00430 |
| AT4G00720 |
| AT4G00740 |
| AT4G01210 |
| AT4G03600* |
| AT4G04525* |
| AT4G04695 |
| AT4G08500 |
| AT4G09000 |
| AT4G10850 |
| AT4G10925 |
| AT4G11660 |
| AT4G11890 |
| AT4G12530 |
| AT4G12950* |
| AT4G13266* |
| AT4G13510 |
| AT4G13770* |
| AT4G14360 |
| AT4G14480* |
| AT4G14780 |
| AT4G14815 |
| AT4G18030 |
| AT4G18710 |
| AT4G18800 |
| AT4G19460 |
| AT4G20140 |
| AT4G20270 |
| AT4G20450* |
| AT4G20790* |
| AT4G21910 |
| AT4G21940 |
| AT4G22120 |
| AT4G22730* |
| AT4G23090* |
| AT4G23150* |
| AT4G23170 |
| AT4G23210 |
| AT4G23270 |
| AT4G23490 |
| AT4G23740* |
| AT4G24120 |
| AT4G26540 |
| AT4G26770* |
| AT4G28490* |
| AT4G28540 |
| AT4G28650* |
| AT4G28700 |
| AT4G29450* |
| AT4G30520* |
| AT4G31100 |
| AT4G31170 |
| AT4G31250* |
| AT4G32250 |
| AT4G32410 |
| AT4G32790 |
| AT4G33430 |
| AT4G33950 |
| AT4G34220* |
| AT4G34870 |
| AT4G35500 |
| AT4G35950 |
| AT4G36180 |
| AT4G37240 |
| AT4G37250* |
| AT4G37690 |
| AT4G38270 |
| AT4G39270 |
| AT4G39400 |
| AT4G39950 |
| AT4G40010 |
| AT5G01890 |
| AT5G03770 |
| AT5G04060 |
| AT5G05160 |
| AT5G05170 |
| AT5G05750 |
| AT5G06100 |
| AT5G06170* |
| AT5G06560 |
| AT5G06820* |
| AT5G07180 |
| AT5G07490* |
| AT5G07510* |
| AT5G07520 |
| AT5G09210 |
| AT5G09890 |
| AT5G10020* |
| AT5G10220 |
| AT5G10290* |
| AT5G10450 |
| AT5G12260 |
| AT5G13170 |
| AT5G14110 |
| AT5G14640 |
| AT5G14870 |
| AT5G16000 |
| AT5G16050 |
| AT5G16570 |
| AT5G16590* |
| AT5G16920 |
| AT5G17700 |
| AT5G19450 |
| AT5G19670 |
| AT5G20160 |
| AT5G20520 |
| AT5G20740 |
| AT5G21040 |
| AT5G22900 |
| AT5G22910* |
| AT5G23320 |
| AT5G24100* |
| AT5G24190* |
| AT5G25930* |
| AT5G27370 |
| AT5G35410 |
| AT5G35870* |
| AT5G37060* |
| AT5G37600 |
| AT5G37660 |
| AT5G37850 |
| AT5G38480 |
| AT5G38990 |
| AT5G39340 |
| AT5G39650* |
| AT5G39990 |
| AT5G40260 |
| AT5G40440 |
| AT5G40595 |
| AT5G40620 |
| AT5G41180* |
| AT5G41460 |
| AT5G41990 |
| AT5G42960 |
| AT5G43020* |
| AT5G43320 |
| AT5G43710* |
| AT5G43980 |
| AT5G44820 |
| AT5G44860 |
| AT5G45780* |
| AT5G45800* |
| AT5G46240 |
| AT5G46330 |
| AT5G47070 |
| AT5G47410* |
| AT5G47420 |
| AT5G48380* |
| AT5G48740 |
| AT5G49760* |
| AT5G51150 |
| AT5G51350 |
| AT5G51560* |
| AT5G53190 |
| AT5G53320* |
| AT5G53450 |
| AT5G53890 |
| AT5G55330* |
| AT5G55650 |
| AT5G55950* |
| AT5G56040* |
| AT5G57810* |
| AT5G57940 |
| AT5G58140 |
| AT5G58150 |
| AT5G58300 |
| AT5G59650* |
| AT5G59670* |
| AT5G60550 |
| AT5G60880 |
| AT5G61630* |
| AT5G62710* |
| AT5G62850 |
| AT5G62880 |
| AT5G63310 |
| AT5G63410 |
| AT5G63710* |
| AT5G63770 |
| AT5G63930* |
| AT5G64030 |
| AT5G64560 |
| AT5G65070 |
| AT5G65430 |
| AT5G65700 |
| AT5G65710 |
| AT5G65970 |
| AT5G66790 |
| AT5G66850 |
| AT5G67250 |
| AT5G67280 |
| AT5G67380 |
