# Supplementary material
Source: Frontiers journal article supplement (https://www.frontiersin.org/articles/2027)
Supplement: downloadfile [file 2027]

**Table S3**: All protein pairs giving a positive read-out for all three markers (His3, Ade2, and LacZ)

| AT2G19190 | = | AT1G11130 |
| --- | --- | --- |
| AT2G19190 | = | AT2G28960 |
| AT2G19190 | = | AT5G25930 |
| AT2G19190 | = | AT2G41820 |
| AT1G14390 | = | AT5G45780 |
| AT1G14390 | = | AT4G20790 |
| AT2G37180 | = | AT5G59650 |
| AT5G65970 | = | AT1G21940 |
| AT5G63710 | = | AT2G30370 |
| AT5G62880 | = | AT1G72770 |
| AT5G62710 | = | AT1G08590 |
| AT5G62710 | = | AT1G67510 |
| AT5G62710 | = | AT1G11130 |
| AT5G62710 | = | AT4G20790 |
| AT5G62710 | = | AT5G25930 |
| AT5G62710 | = | AT2G41820 |
| AT5G62710 | = | AT2G28960 |
| AT5G62710 | = | AT4G12950 |
| AT5G57810 | = | AT4G12950 |
| AT5G55650 | = | AT2G31880 |
| AT5G51150 | = | AT1G72180 |
| AT5G47070 | = | AT1G71020 |
| AT5G45800 | = | AT5G59650 |
| AT5G45800 | = | AT2G36020 |
| AT5G40620 | = | AT1G48270 |
| AT5G39990 | = | AT1G72180 |
| AT5G16920 | = | AT3G24660 |
| AT5G16000 | = | AT5G24100 |
| AT5G13170 | = | AT5G24100 |
| AT4G40010 | = | AT2G23950 |
| AT4G39270 | = | AT3G24660 |
| AT4G38270 | = | AT1G72180 |
| AT4G36180 | = | AT2G41820 |
| AT5G51560 | = | AT4G28490 |
| AT4G35950 | = | AT5G43020 |
| AT4G35950 | = | AT1G32320 |
| AT4G35950 | = | AT5G51560 |
| AT4G35950 | = | AT4G34220 |
| AT4G35950 | = | AT1G67510 |
| AT4G35950 | = | AT5G06820 |
| AT4G35950 | = | AT4G13770 |
| AT4G35950 | = | AT4G30520 |
| AT4G35950 | = | AT3G03770 |
| AT4G35950 | = | AT4G37250 |
| AT4G35950 | = | AT4G31250 |
| AT4G35950 | = | AT1G72770 |
| AT4G35950 | = | AT3G63380 |
| AT4G35950 | = | AT1G34210 |
| AT4G35950 | = | AT1G71830 |
| AT4G35950 | = | AT4G20450 |
| AT4G35950 | = | AT2G36020 |
| AT4G35950 | = | AT1G48270 |
| AT4G35950 | = | AT2G28960 |
| AT4G35950 | = | AT1G11310 |
| AT4G35950 | = | AT5G25930 |
| AT4G31250 | = | AT2G27060 |
| AT4G31250 | = | AT5G06820 |
| AT4G23740 | = | AT1G11130 |
| AT4G23740 | = | AT1G64780 |
| AT4G23740 | = | AT3G28040 |
| AT4G23740 | = | AT5G25930 |
| AT4G23740 | = | AT5G63930 |
| AT4G23740 | = | AT2G41820 |
| AT4G23740 | = | AT1G11310 |
| AT4G23740 | = | AT1G21940 |
| AT4G23740 | = | AT1G18520 |
| AT4G18800 | = | AT5G55950 |
| AT4G13510m5 | = | AT5G55950 |
| AT4G10925 | = | AT1G11130 |
| AT3G60720 | = | AT4G12950 |
| AT3G45290 | = | AT1G66830 |
| AT3G44930 | = | AT5G16590 |
| AT3G44900 | = | AT5G06170 |
| AT3G24300 | = | AT1G24650 |
| AT3G24300 | = | AT3G56370 |
| AT3G17630 | = | AT1G66830 |
| AT3G17630 | = | AT1G34210 |
| AT3G17630 | = | AT1G08590 |
| AT3G12660 | = | AT4G14480 |
| AT3G03770 | = | AT2G41820 |
| AT3G03770 | = | AT5G10290 |
| AT2G37050 | = | AT1G63700 |
| AT2G37050 | = | AT4G20450 |
| AT2G37050 | = | AT5G25930 |
| AT2G37050 | = | AT5G10290 |
| AT2G37050 | = | AT2G28960 |
| AT2G33330 | = | AT4G14480 |
| AT2G33330 | = | AT4G12950 |
| AT2G33170 | = | AT4G14480 |
| AT2G33170 | = | AT4G12950 |
| AT4G20450 | = | AT1G34210 |
| AT2G23770GS | = | AT2G31880 |
| AT2G20850 | = | AT5G10290 |
| AT2G16250 | = | AT3G06100 |
| AT2G16250 | = | AT5G48380 |
| AT2G16250 | = | AT3G28040 |
| AT2G16250 | = | AT5G63930 |
| AT2G16250 | = | AT2G41820 |
| AT2G16250 | = | AT1G11310 |
| AT2G16250 | = | AT5G10290 |
| AT2G01660 | = | AT5G06170 |
| AT2G01660 | = | AT1G71020 |
| AT2G01660 | = | AT1G72180 |
| AT2G01660 | = | AT4G14480 |
| AT2G01660 | = | AT1G71830 |
| AT2G01660 | = | AT4G12950 |
| AT2G01570 | = | AT3G24660 |
| AT1G78300 | = | AT5G24100 |
| AT1G78300 | = | AT1G24650 |
| AT1G75820 | = | AT5G55950 |
| AT1G72300 | = | AT2G31880 |
| AT1G70690 | = | AT4G12950 |
| AT1G67510 | = | AT4G20790 |
| AT1G64870 | = | AT5G45780 |
| AT1G59670 | = | AT5G45780 |
| AT1G49720 | = | AT1G71830 |
| AT1G17750 | = | AT3G24660 |
| AT1G11230 | = | AT3G24660 |
| AT1G11000 | = | AT2G23950 |
| AT1G11000 | = | AT1G21940 |
| AT1G11000 | = | AT4G12950 |
| AT1G09840 | = | AT2G31880 |
| AT1G07550 | = | AT2G41820 |
| AT1G06225 | = | AT4G12950 |
| AT2G01210 | = | AT5G48380 |
| AT2G01210 | = | AT5G25930 |
| AT2G01210 | = | AT5G59650 |
| AT4G26540 | = | AT4G28490 |
| AT3G20190 | = | AT1G24650 |
| AT3G20190 | = | AT5G25930 |
| AT1G64780 | = | AT5G59650 |
| AT1G42560 | = | AT3G24660 |
| AT1G42560 | = | AT5G59650 |
| AT5G58300 | = | AT1G24650 |
| AT5G10290 | = | AT2G28960 |
| AT5G48740 | = | AT2G28960 |
| AT5G48740 | = | AT5G10290 |
| AT4G12950 | = | AT4G14480 |
| AT4G12950 | = | AT4G12950 |
| AT5G43980 | = | AT2G31880 |
| AT5G43980 | = | AT4G12950 |
| AT5G41180 | = | AT4G28490 |
| AT5G39650 | = | AT5G22910 |
| AT5G23320 | = | AT1G15610 |
| AT4G30520 | = | AT2G30370 |
| AT4G29450 | = | AT3G24660 |
| AT4G13510m3 | = | AT5G59650 |
| AT4G13510m3 | = | AT1G72180 |
| AT4G13510 | = | AT1G21940 |
| AT4G13510 | = | AT4G03600 |
| AT4G13510 | = | AT1G48270 |
| AT4G13510 | = | AT1G15610 |
| AT4G13510 | = | AT5G06170 |
| AT4G13510 | = | AT4G26770 |
| AT4G13510 | = | AT5G55330 |
| AT4G13510 | = | AT4G12950 |
| AT4G13510 | = | AT2G28990 |
| AT4G03600 | = | AT4G03600 |
| AT3G54820 | = | AT3G53420 |
| AT3G54820 | = | AT5G22910 |
| AT3G53720 | = | AT1G72180 |
| AT3G51740 | = | AT1G11130 |
| AT3G51740 | = | AT5G25930 |
| AT3G49670 | = | AT5G25930 |
| AT3G42880 | = | AT2G41820 |
| AT3G29160 | = | AT5G24100 |
| AT3G29160 | = | AT2G28990 |
| AT3G08510 | = | AT1G07560 |
| AT3G08510 | = | AT3G63380 |
| AT3G08510 | = | AT1G11310 |
| AT3G08510 | = | AT4G26770 |
| AT3G08510 | = | AT5G55330 |
| AT3G08510 | = | AT1G18520 |
| AT3G08510 | = | AT5G48380 |
| AT3G08510 | = | AT3G28040 |
| AT3G08510 | = | AT5G25930 |
| AT3G08510 | = | AT5G63930 |
| AT3G08510 | = | AT5G10290 |
| AT3G08510 | = | AT2G28960 |
| AT3G08510 | = | AT2G41820 |
| AT3G08510 | = | AT2G36020 |
| AT3G08510 | = | AT2G28990 |
| AT3G08510 | = | AT4G13770 |
| AT3G08510 | = | AT4G30520 |
| AT3G08510 | = | AT3G26110 |
| AT3G08510 | = | AT1G21940 |
| AT3G08510 | = | AT5G55950 |
| AT3G08510 | = | AT2G38120 |
| AT3G08510 | = | AT1G57550 |
| AT1G57550 | = | AT1G57550 |
| AT1G57550 | = | AT4G26770 |
| AT1G57550 | = | AT1G48270 |
| AT3G02880 | = | AT4G20790 |
| AT3G02880 | = | AT1G11130 |
| AT3G02880 | = | AT2G41820 |
| AT5G48380 | = | AT5G59650 |
| AT5G48380 | = | AT2G07040 |
| AT5G48380 | = | AT5G48380 |
| AT5G48380 | = | AT5G16590 |
| AT5G48380 | = | AT5G10290 |
| AT5G48380 | = | AT4G14480 |
| AT5G48380 | = | AT1G18520 |
| AT5G48380 | = | AT3G28040 |
| AT5G48380 | = | AT5G63930 |
| AT5G48380 | = | AT2G28960 |
| AT5G48380 | = | AT1G11310 |
| AT5G48380 | = | AT4G12950 |
| AT5G48380 | = | AT5G39650 |
| AT2G47060 | = | AT1G72180 |
| AT2G47060 | = | AT2G28990 |
| AT2G38120 | = | AT5G16590 |
| AT2G31880 | = | AT1G24650 |
| AT2G31880 | = | AT4G28490 |
| AT5G16590 | = | AT1G69970 |
| AT5G16590 | = | AT5G25930 |
| AT2G28180 | = | AT5G16590 |
| AT2G26980 | = | AT1G24650 |
| AT2G26980 | = | AT1G71020 |
| AT2G24230 | = | AT5G56040 |
| AT2G24230 | = | AT2G41820 |
| AT1G79570 | = | AT4G28650 |
| AT1G51340 | = | AT1G72180 |
| AT1G47240 | = | AT1G34210 |
| AT1G47240 | = | AT1G48270 |
| AT1G47240 | = | AT1G15610 |
| AT1G47240 | = | AT4G03600 |
| AT1G47240 | = | AT5G06170 |
| AT1G47240 | = | AT5G55330 |
| AT1G47240 | = | AT1G18520 |
| AT1G32320 | = | AT1G72770 |
| AT1G08590 | = | AT5G59650 |
| AT1G31420 | = | AT2G36020 |
| AT1G31420 | = | AT4G14480 |
| AT1G31420 | = | AT1G11310 |
| AT1G31420 | = | AT1G08590 |
| AT1G18520 | = | AT5G56040 |
| AT1G15170 | = | AT1G71020 |
| AT5G55950 | = | AT2G31880 |
| AT1G11730 | = | AT5G55950 |
| AT3G28040 | = | AT5G16590 |
| AT1G11130 | = | AT4G20790 |
| AT1G11130 | = | AT3G02880 |
| AT1G11130 | = | AT5G48380 |
| AT1G11130 | = | AT1G11130 |
| AT1G11130 | = | AT5G63930 |
| AT1G11130 | = | AT1G11310 |
| AT1G11130 | = | AT2G27060 |
| AT1G11130 | = | AT5G10290 |
| AT1G11130 | = | AT2G07040 |
| AT1G11130 | = | AT5G24100 |
| AT1G11130 | = | AT3G28040 |
| AT3G61500 | = | AT3G24660 |
| AT1G08280 | = | AT3G61500 |
| AT1G03520 | = | AT1G71020 |
| AT1G67820 | = | AT3G24660 |
| AT1G67820 | = | AT5G59650 |
| AT5G60880 | = | AT2G14510 |
| AT5G38480 | = | AT3G24660 |
| AT5G20520 | = | AT1G72180 |
| AT5G07520 | = | AT5G07510 |
| AT5G07520 | = | AT1G57550 |
| AT5G07520 | = | AT4G26770 |
| AT5G07520 | = | AT4G03600 |
| AT5G07520 | = | AT3G24660 |
| AT4G35500 | = | AT1G71020 |
| AT4G35500 | = | AT3G24660 |
| AT2G41820 | = | AT1G34210 |
| AT2G41820 | = | AT5G48380 |
| AT2G41820 | = | AT1G71830 |
| AT2G41820 | = | AT5G25930 |
| AT2G41820 | = | AT5G63930 |
| AT2G41820 | = | AT2G41820 |
| AT2G41820 | = | AT5G10290 |
| AT2G41820 | = | AT4G12950 |
| AT4G28650 | = | AT2G28990 |
| AT4G28650 | = | AT2G41820 |
| AT4G26770 | = | AT1G57550 |
| AT4G26770 | = | AT3G26110 |
| AT4G26770 | = | AT1G21940 |
| AT4G26770 | = | AT4G03600 |
| AT4G26770 | = | AT5G55330 |
| AT4G26770 | = | AT4G26770 |
| AT4G26770 | = | AT1G15610 |
| AT4G26770 | = | AT1G48270 |
| AT3G28340 | = | AT3G24660 |
| AT3G22430 | = | AT3G24660 |
| AT3G21690 | = | AT1G21940 |
| AT3G21690 | = | AT3G24660 |
| AT3G21310 | = | AT3G24660 |
| AT3G17820 | = | AT3G24660 |
| AT3G06360 | = | AT2G38120 |
| AT3G06360 | = | AT3G26110 |
| AT3G06360 | = | AT1G15610 |
| AT3G06360 | = | AT4G03600 |
| AT3G06360 | = | AT5G06170 |
| AT3G06360 | = | AT4G26770 |
| AT3G06360 | = | AT1G57550 |
| AT3G06360 | = | AT1G48270 |
| AT3G06360 | = | AT5G55330 |
| AT5G63930 | = | AT4G20450 |
| AT5G63930 | = | AT5G10290 |
| AT5G63930 | = | AT3G28040 |
| AT5G63930 | = | AT2G28960 |
| AT5G63930 | = | AT1G11310 |
| AT3G02130 | = | AT1G31420 |
| AT3G02130 | = | AT5G47410 |
| AT3G02130 | = | AT5G24100 |
| AT3G02130 | = | AT1G64780 |
| AT3G02130 | = | AT3G63380 |
| AT3G02130 | = | AT2G45340 |
| AT3G02130 | = | AT4G20450 |
| AT3G02130 | = | AT4G14480 |
| AT3G02130 | = | AT2G31880 |
| AT3G02130 | = | AT3G28040 |
| AT3G02130 | = | AT1G11310 |
| AT3G02130 | = | AT5G10290 |
| AT3G02130 | = | AT5G48380 |
| AT3G02130 | = | AT2G28960 |
| AT3G02130 | = | AT5G63930 |
| AT2G45910 | = | AT5G45780 |
| AT2G40180 | = | AT3G24660 |
| AT3G53420 | = | AT5G39650 |
| AT3G53420 | = | AT3G53420 |
| AT3G53420 | = | AT5G22910 |
| AT2G37170 | = | AT5G22910 |
| AT2G37170 | = | AT2G30370 |
| AT2G37170 | = | AT3G53420 |
| AT2G36020 | = | AT2G36020 |
| AT2G28990 | = | AT2G41820 |
| AT2G26730 | = | AT2G14510 |
| AT2G26730 | = | AT4G20450 |
| AT2G26730 | = | AT3G28040 |
| AT2G26730 | = | AT5G10290 |
| AT2G26730 | = | AT2G28960 |
| AT2G26730 | = | AT1G11310 |
| AT2G26730 | = | AT2G45340 |
| AT2G26730 | = | AT1G11130 |
| AT2G26730 | = | AT3G06100 |
| AT2G26730 | = | AT5G63930 |
| AT2G26730 | = | AT2G28990 |
| AT2G26110 | = | AT3G24660 |
| AT2G20970 | = | AT3G24660 |
| AT2G04080 | = | AT3G24660 |
| AT1G58520 | = | AT1G24650 |
| AT1G58520 | = | AT3G56370 |
| AT1G48470 | = | AT1G63430 |
| AT5G56040 | = | AT5G16590 |
| AT1G47220 | = | AT3G56370 |
| AT1G47220 | = | AT5G56040 |
| AT1G34210 | = | AT5G55330 |
| AT1G34210 | = | AT5G48380 |
| AT1G34210 | = | AT2G41820 |
| AT1G34210 | = | AT5G49760 |
| AT1G28695 | = | AT3G24660 |
| AT1G26850 | = | AT3G24660 |
| AT1G22300 | = | AT3G24660 |
| AT1G11310 | = | AT1G48270 |
| AT3G56370 | = | AT4G20450 |
| AT1G08650 | = | AT2G31880 |
| AT1G08650 | = | AT3G56370 |
| AT1G08650 | = | AT2G23950 |
| AT1G07795 | = | AT3G24660 |
